# Supplementary material for: Hierarchical Cu4V2.15O9.38micro-/nanostructures: a lithium intercalating electrode material
Source: Royal Society of Chemistry journal article supplement (doi:10.1039/c0nr00657b), 2010-12-06
Supplement: c0nr00657b.pdf [file c0nr00657b.pdf]

# Hierarchical $\text{Cu}_4\text{V}_{2.15}\text{O}_{9.38}$ Micro-/Nanostructures: A Promising Cathode Material for Primary Lithium Ion Batteries

*Liang Zhou,<sup>a</sup> Wangjun Cui,<sup>a</sup> Jiamin Wu,<sup>a</sup> Qingfei Zhao,<sup>b</sup> Hexing Li,<sup>b</sup> Yongyao Xia,<sup>b</sup> Yunhua Wang,<sup>a</sup>  
and Chengzhong Yu<sup>a, c, \*</sup>*

<sup>a</sup> Department of Chemistry and Shanghai Key Laboratory of Molecular Catalysis and Innovative Materials, Fudan University, Shanghai 200433, P.R. China, <sup>b</sup> Department of Chemistry, Shanghai Normal University, Shanghai, 200234, P.R. China, and <sup>c</sup>ARC Centre of Excellence for Functional Nanomaterials and Australian Institute for Bioengineering and Nanotechnology, The University of Queensland, Brisbane, QLD 4072, Australia

\*To whom correspondence should be addressed. Email: [c.yu@uq.edu.au](mailto:c.yu@uq.edu.au).

## Supporting Information

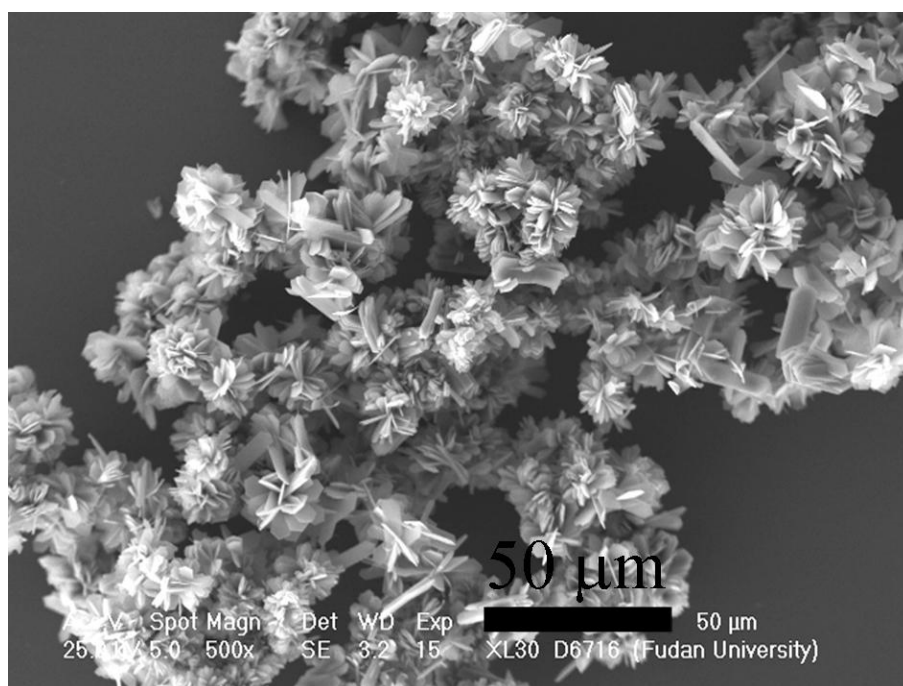

**Figure S1.** SEM images showing the overall morphologies of  $\text{Cu}_4\text{V}_{2.15}\text{O}_{9.38}$  hierarchical structures.

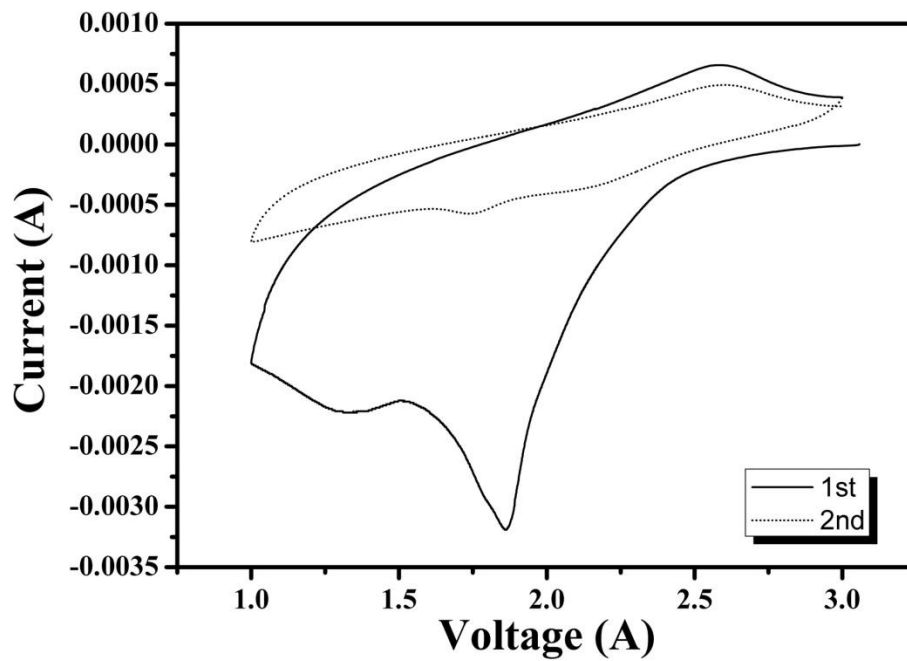

**Figure S2.** CVs of the electrode made from the as-prepared hierarchical  $\text{Cu}_4\text{V}_{2.15}\text{O}_{9.38}$  micro-/nanostructures.

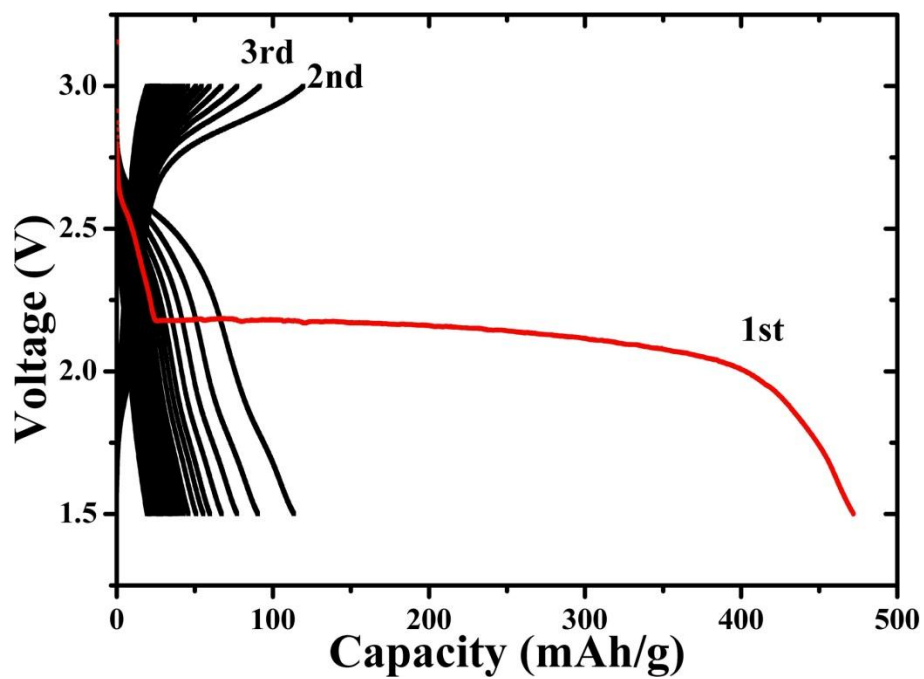

**Figure S3.** Discharge profiles of the cell made from  $\text{Cu}_4\text{V}_{2.15}\text{O}_{9.38}$  micro-/nanostructures at the current density of 20 mA/g between 3.0 and 1.5V.

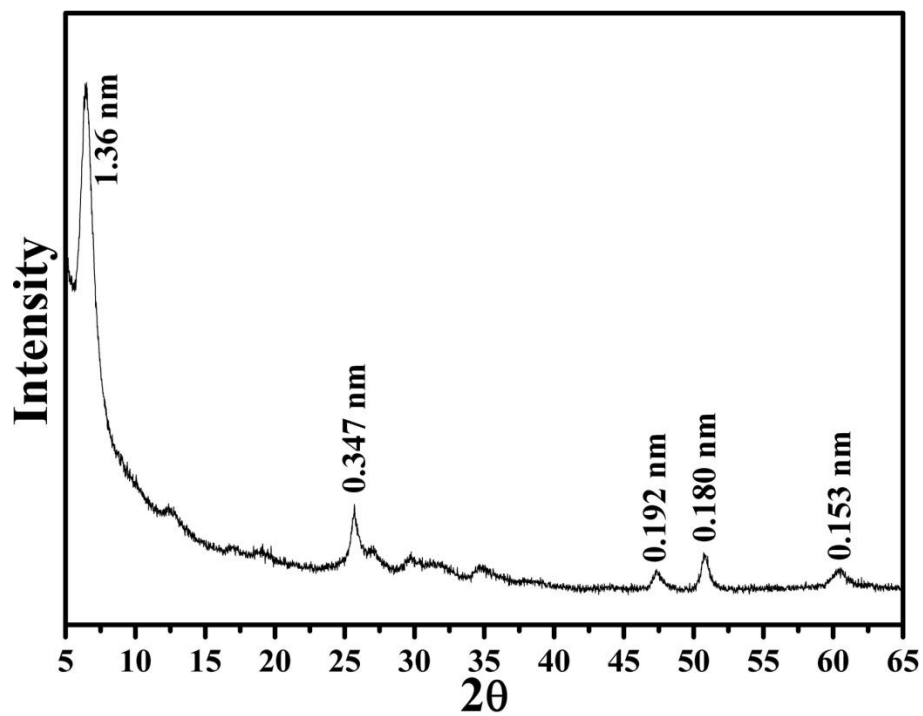

**Figure S4.** XRD pattern of layered vanadium oxide hydrate phase. (The synthesis conditions were identical with those of hierarchical  $\text{Cu}_4\text{V}_{2.15}\text{O}_{9.38}$  in this case except no urea was used.)

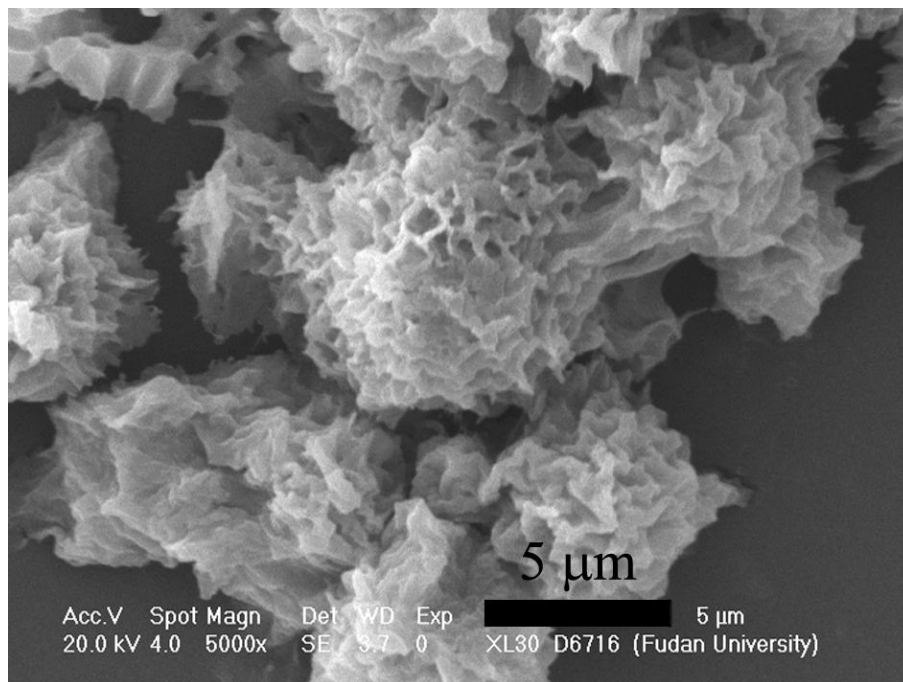

**Figure S5.** SEM image of layered vanadium oxide hydrate phase. (The synthesis conditions were identical with those of hierarchical  $\text{Cu}_4\text{V}_{2.15}\text{O}_{9.38}$  in this case except no urea was used.)

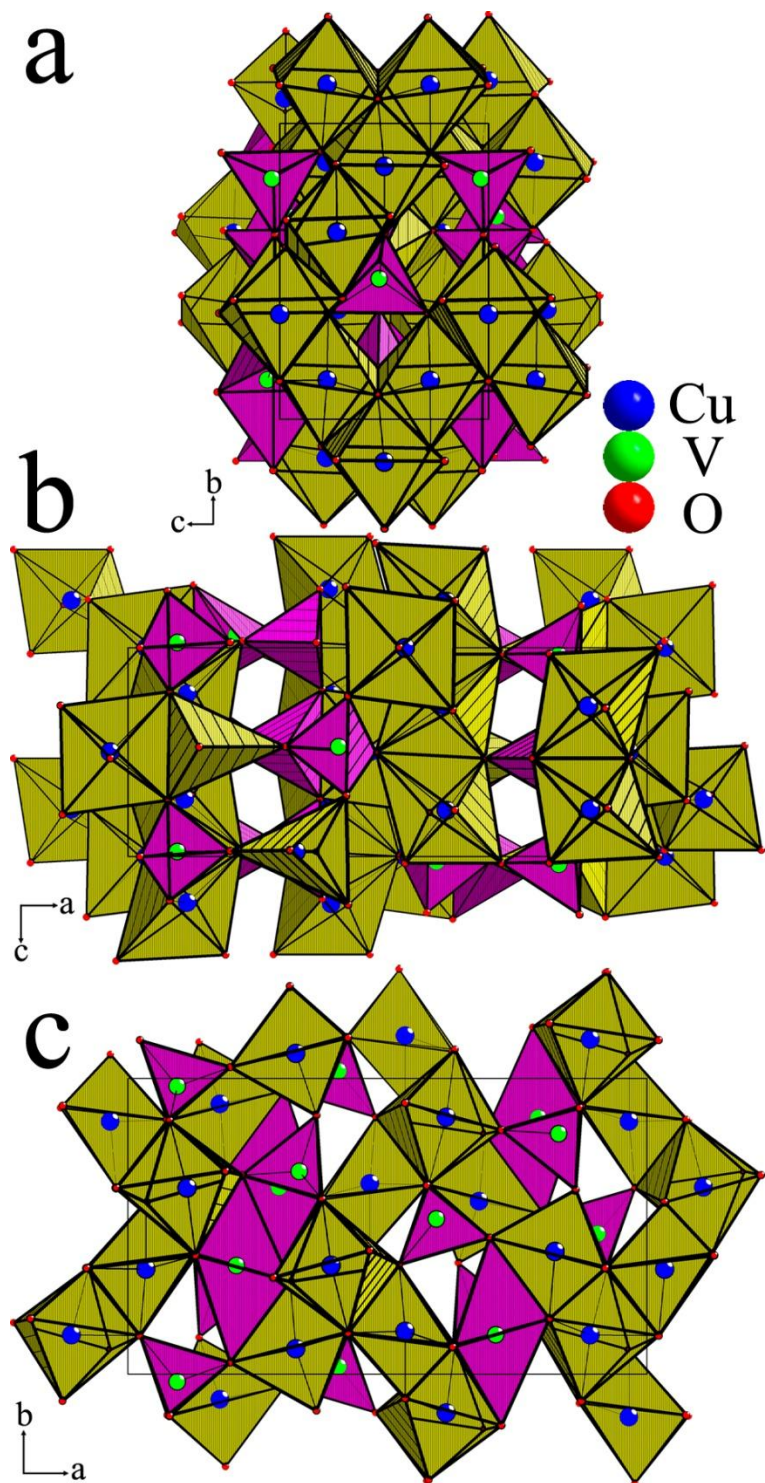

**Figure S6.** Structure model of  $\text{Cu}_4\text{V}_{2.15}\text{O}_{9.38}$  from a) [100], b) [010], and c) [001] direction. The  $\text{Cu}_4\text{V}_{2.15}\text{O}_{9.38}$  are built up of  $[\text{VO}_4]$  tetrahedral,  $[\text{VO}_5]$  trigonal bipyramids,  $[\text{CuO}_6]$  octahedral, and  $[\text{CuO}_5]$  trigonal bipyramids.
